# Supplementary material for: Expression and Ion Transport Activity of Rice OsHKT1;1 Variants
Source: PubMed Central journal article supplement (PMC7020204; doi:10.3390/plants9010016), 2019-12-21
Supplement: plants-09-00016-s001.pdf [file plants-09-00016-s001.pdf]

## **Electrophysiological Analysis of Rice OsHKT1;1 Variants**

Shahin Imran, Tomoaki Horie, Maki Katsuhara

**Supplementary Materials:** Table S1: Gene-specific primer pairs used for the cloning and in the real-time PCR experiments, Figure S1: Specific primer position of OsHKT1;1-FL and its eight variant for qPCR assay, Figure S2: Nucleotide sequence alignment of Pokkali OsHKT1;1 genomic DNA and full-length cDNA, Figure S3: Nucleotide sequence alignment of OsHKT1;1-FL and its eight variant, Figure S4; Protein sequence alignment of OsHKT1;1-FL and its eight variant, Figure S5: Expression analyzed with RT-PCR.

Supplementary Table S1.

Gene-specific primer pairs used for the cloning and in the real-time PCR experiments.

|             | 5' → 3' | For full-length cloning  | For RT-PCR and real-time RT-PCR |
|-------------|---------|--------------------------|---------------------------------|
| OsHKT1;1-FL | Forward | GTTGAAGAATGCATCCACCAAG   |                                 |
|             | Reverse | CTCATTTTCAGGATGAACTCCTTG |                                 |
| OsHKT1;1-FL | Forward |                          | CCCTTTGGTAGTTCAGCTCGTTT         |
|             | Reverse |                          | GATGACAGAACTGGAAATGACAG         |
| OsHKT1;1-V1 | Forward |                          | AGATGTGTGAATCTCAAGCCCCAG        |
|             | Reverse |                          | ATAACCTGTCACTATGCGAACCAA        |
| OsHKT1;1-V2 | Forward |                          | CGCAAAACCAGATGCAAGAAATG         |
|             | Reverse |                          | CCTCACATGCAAATGTTTGTAGCC        |
| OsHKT1;1-V3 | Forward |                          | GCTACAAACATTTGCATGTACCTTCC      |
|             | Reverse |                          | AACTTCTGGCAACTGTATCCTAGTG       |
| OsHKT1;1-V4 | Forward |                          | AAACCAGGTACCTTCCTTCCGAT         |
|             | Reverse |                          | GGCAACTGTATCCTAGTGAGTAGC        |
| OsHKT1;1-V5 | Forward |                          | CCAGATGTGTGAATCTCAAGCCCC        |
|             | Reverse |                          | CATCGGAAGGAAGGTACCTGGTTTT       |
| OsHKT1;1-V6 | Forward |                          | ATGCTTCCTACGGGTTTCGTCCGGCAGGT   |
|             | Reverse |                          | TTATTAGGAGCAGATACGAATGGC        |
| OsHKT1;1-V7 | Forward |                          | CCCTCACTAAAGGGAACAAAAGC         |
|             | Reverse |                          | GGGGCTTGAGATTCACACATCTG         |
| OsHKT1;1-V8 | Forward |                          | GTCGCAAAACCAGAAAGGAAGTCAA       |
|             | Reverse |                          | GGATAACTATCAGCTTACCCTCCTC       |
| Actin       | Forward |                          | CTAGCCTCACTCAGCACTTT            |
|             | Reverse |                          | CGTGGAGATCAGAAGCAC              |

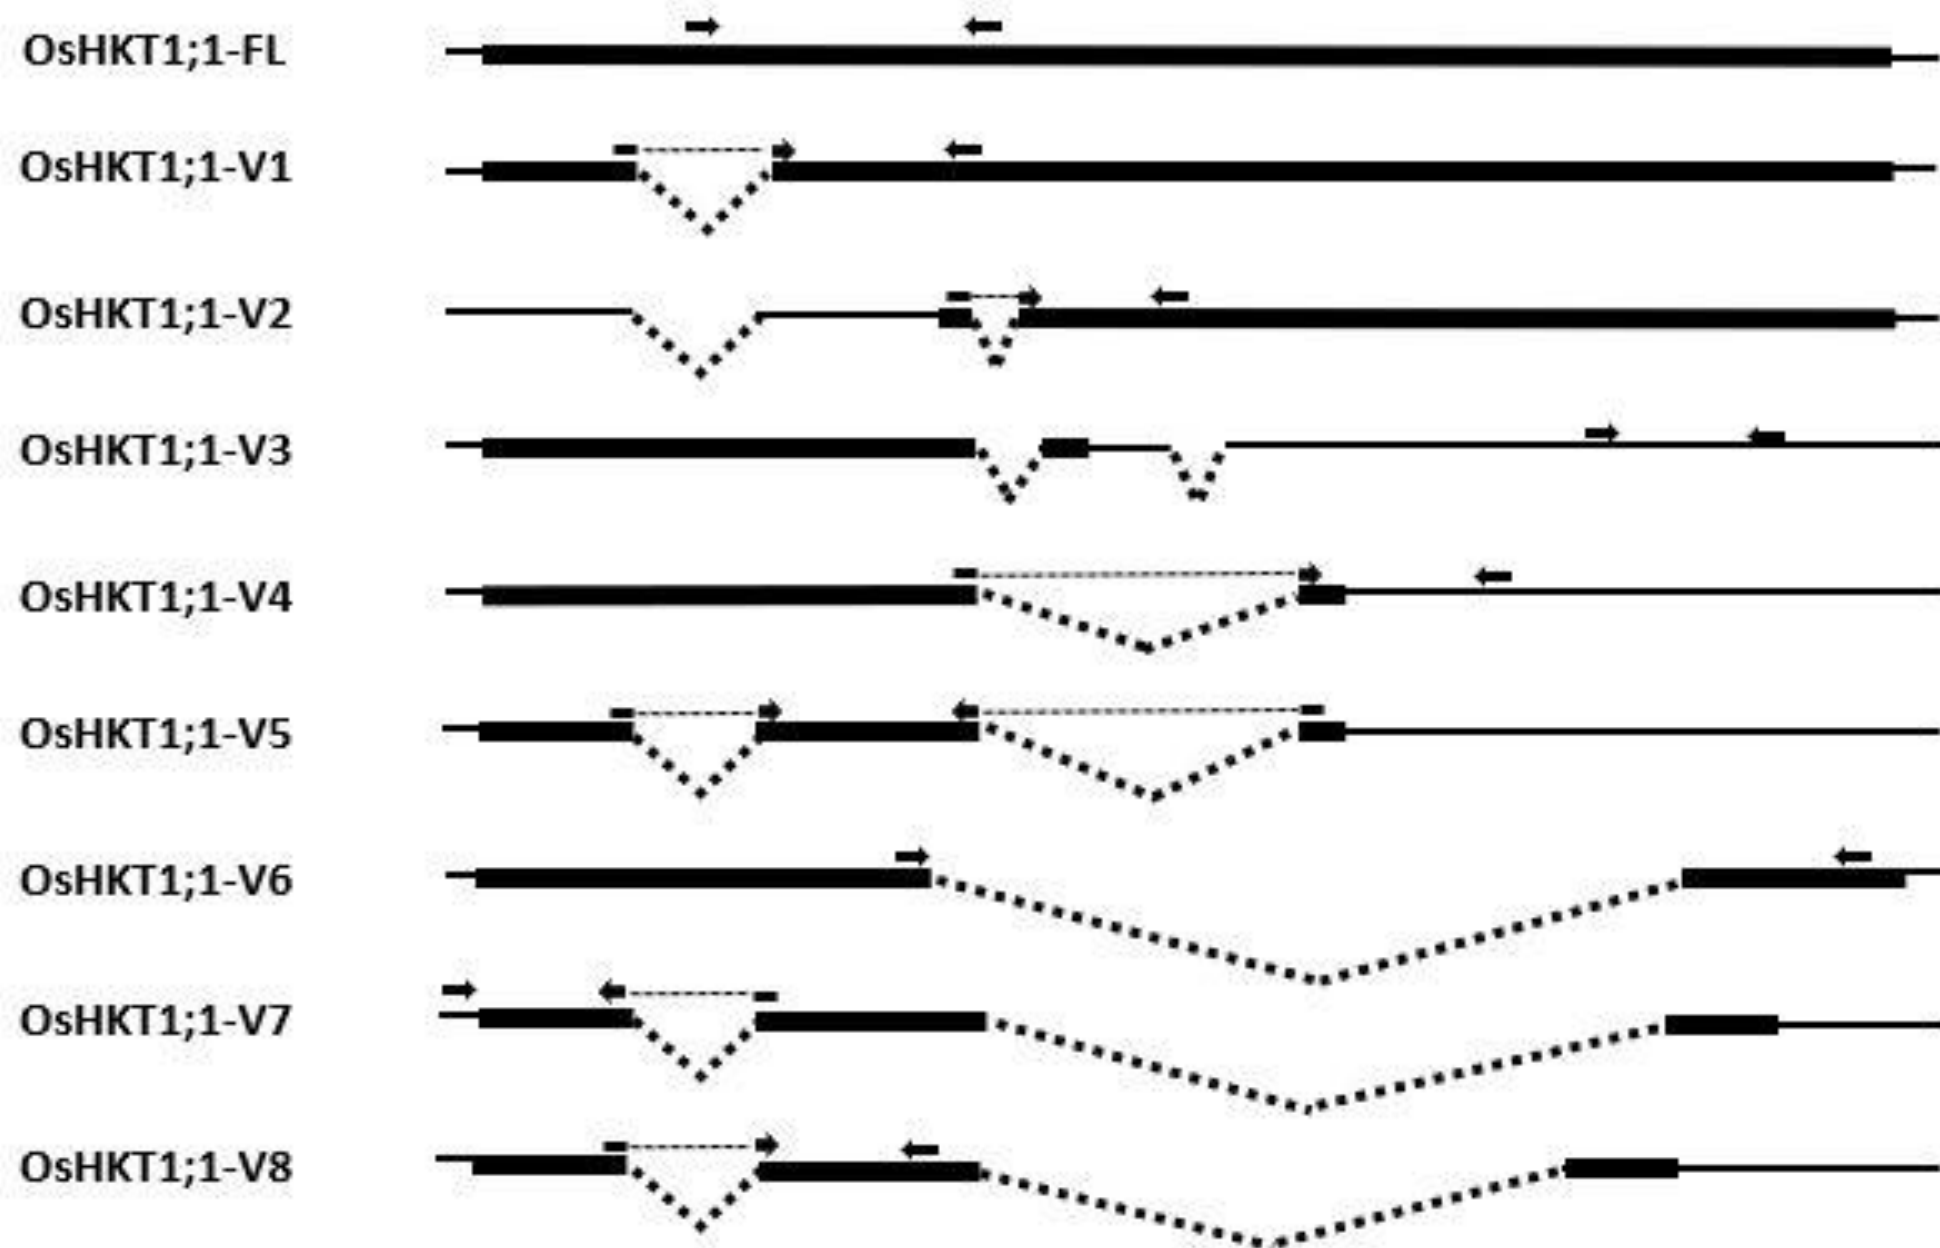

**Supplementary Figure S1.**

Specific primer position of OsHKT1;1-FL and its eight variant for qPCR assay. Right arrows indicate forward primers, and left arrows indicate reverse primer.

|                              |      |                                                               |      |
|------------------------------|------|---------------------------------------------------------------|------|
| Pokkali OsHKT1;1 Genomic DNA | 0    | -----                                                         | 0    |
| OsHKT1;1-FL                  | 1    | GGGCCCCCTCGAGTGCACGGTATCGATAAGCTTGGCTTCTCTTTTTCGAGAAGCTCAGA   | 60   |
| Pokkali OsHKT1;1 Genomic DNA | 1    | -----                                                         | 8    |
| OsHKT1;1-FL                  | 61   | ATAAAGCGTCAACTTTGGCAGAACCATGCATCCACCAAGTTAGTGTAGATACCTTGAA    | 120  |
| Pokkali OsHKT1;1 Genomic DNA | 9    | CGGTATCAA-CTATACATAGCCATGAAGCTCCTGTTACCGAATTCGGAGGTGCTTCGGAT  | 67   |
| OsHKT1;1-FL                  | 121  | GCGTATCAAACATAACATAGCCATGAAGCTCCTGTTACCGAATTCGGAGGTGCTTCGGAT  | 180  |
| Pokkali OsHKT1;1 Genomic DNA | 68   | CTATTGGGAGAAAGCTCAGCATCTCTGTGGGTTCTCCATGAAGCTCATTCCAGAGC      | 127  |
| OsHKT1;1-FL                  | 181  | CTATTGGGAGAAAGCTCAGCATCTCTGTGGGTTCTCCATGAAGCTCATTCCAGAGC      | 240  |
| Pokkali OsHKT1;1 Genomic DNA | 128  | CAGATGTGTGGCAAGTCTGTCAAACAATCTTACAGTTTCTGGTTTGCAAAGTAACCC     | 187  |
| OsHKT1;1-FL                  | 241  | CAGATGTGTGGCAAGTCTGTCAAACAATCTTACAGTTTCTGGTTTGCAAAGTAACCC     | 300  |
| Pokkali OsHKT1;1 Genomic DNA | 188  | TTTGGTAGTTCAGCTCGTTTACTTTTGTGATAATCTCATTGCTGGTTTCTTGTCTGAA    | 247  |
| OsHKT1;1-FL                  | 301  | TTTGGTAGTTCAGCTCGTTTACTTTTGTGATAATCTCATTGCTGGTTTCTTGTCTGAA    | 360  |
| Pokkali OsHKT1;1 Genomic DNA | 248  | GAATCTCAAGCCCCAGGGTAAGCCAGGTCCAAGGATTTGGACCTGTTGTTACCTCTGT    | 307  |
| OsHKT1;1-FL                  | 361  | GAATCTCAAGCCCCAGGGTAAGCCAGGTCCAAGGATTTGGACCTGTTGTTACCTCTGT    | 420  |
| Pokkali OsHKT1;1 Genomic DNA | 308  | GTCTACACTTACTGTCTCGAGCATGGCAACAGTAGAGATGGAAGACTTATCTGACAGGCA  | 367  |
| OsHKT1;1-FL                  | 421  | GTCTACACTTACTGTCTCGAGCATGGCAACAGTAGAGATGGAAGACTTATCTGACAGGCA  | 480  |
| Pokkali OsHKT1;1 Genomic DNA | 368  | ACTCTGGGTTCTGATCCTTCTGATGCTAATGGGAGGAGAGTGTTCACATCAATGCTAGG   | 427  |
| OsHKT1;1-FL                  | 481  | ACTCTGGGTTCTGATCCTTCTGATGCTAATGGGAGGAGAGTGTTCACATCAATGCTAGG   | 540  |
| Pokkali OsHKT1;1 Genomic DNA | 428  | GCTCTACTTCAACAATGCCAATGCCAACAGAAATGAGAACAGCCAGAGAGTTACCTTC    | 487  |
| OsHKT1;1-FL                  | 541  | GCTCTACTTCAACAATGCCAATGCCAACAGAAATGAGAACAGCCAGAGAGTTACCTTC    | 600  |
| Pokkali OsHKT1;1 Genomic DNA | 488  | AATCAGCTTGGACATTGAATCCAACAGTCTCCGAAACAATGGGGATCACAATAACGGA    | 547  |
| OsHKT1;1-FL                  | 601  | AATCAGCTTGGACATTGAATCCAACAGTCTCCGAAACAATGGGGATCACAATAACGGA    | 660  |
| Pokkali OsHKT1;1 Genomic DNA | 548  | ATGTGGCCAATCAGAAGAACTATGTGCAAAACCCAGGTACAGCAAAAACAAAAGCATAAC  | 607  |
| OsHKT1;1-FL                  | 661  | ATGTGGCCAATCAGAAGAACTATGTGCAAAACCCAGGTACAGCAAAAACAAAAGCATAAC  | 720  |
| Pokkali OsHKT1;1 Genomic DNA | 608  | ATATAATCCTTGGCTGTGTTGGTTCGATAGTGACAGGTTATTTTCGTAGTACTGTCAAT   | 667  |
| OsHKT1;1-FL                  | 721  | ATATAATCCTTGGCTGTGTTGGTTCGATAGTGACAGGTTATTTTCGTAGTACTGTCAAT   | 780  |
| Pokkali OsHKT1;1 Genomic DNA | 668  | TTCCAGTTCGTGATCATTATTTTACTTTTGGATTGATTCAGATGCAAGAAATGTACT     | 727  |
| OsHKT1;1-FL                  | 781  | TTCCAGTTCGTGATCATTATTTTACTTTTGGATTGATTCAGATGCAAGAAATGTACT     | 840  |
| Pokkali OsHKT1;1 Genomic DNA | 728  | GAAAAGTAAGGAGATCAGTATGTATACCTTTTGCATCTTCACAGCAGTGTCTCGTTCGC   | 787  |
| OsHKT1;1-FL                  | 841  | GAAAAGTAAGGAGATCAGTATGTATACCTTTTGCATCTTCACAGCAGTGTCTCGTTCGC   | 900  |
| Pokkali OsHKT1;1 Genomic DNA | 788  | AAACTGTGGCTTCACGCCACTAAATAGTAACATGCAACCCCTTCAGAAAAGACTGGGTCT  | 847  |
| OsHKT1;1-FL                  | 901  | AAACTGTGGCTTCACGCCACTAAATAGTAACATGCAACCCCTTCAGAAAAGACTGGGTCT  | 960  |
| Pokkali OsHKT1;1 Genomic DNA | 848  | TTTGCTCCTAGTATCCCGCAGATTCTAGCAGGCAATACCTTGTTTTACCACCTCTTGGC   | 907  |
| OsHKT1;1-FL                  | 961  | TTTGCTCCTAGTATCCCGCAGATTCTAGCAGGCAATACCTTGTTTTACCACCTCTTGGC   | 1020 |
| Pokkali OsHKT1;1 Genomic DNA | 908  | GCTATGCGTATGGGTTTGGGGAAGGTGAGTGGAAAAGCAGAGTATGCTTACATCCTTCA   | 967  |
| OsHKT1;1-FL                  | 1021 | GCTATGCGTATGGGTTTGGGGAAGGTGAGTGGAAAAGCAGAGTATGCTTACATCCTTCA   | 1080 |
| Pokkali OsHKT1;1 Genomic DNA | 968  | GCATCCTGGGAGACTGGCTACAACATTTGCATGTGAGGAGAAATCTGTTTACATTGT     | 1027 |
| OsHKT1;1-FL                  | 1081 | GCATCCTGGGAGACTGGCTACAACATTTGCATGTGAGGAGAAATCTGTTTACATTGT     | 1140 |
| Pokkali OsHKT1;1 Genomic DNA | 1028 | TCTGAGTGTACTGGACTGATTTCTACTGCAAGTAAATGTTTATTTGCTCGTTGAGTGGAA  | 1087 |
| OsHKT1;1-FL                  | 1141 | TCTGAGTGTACTGGACTGATTTCTACTGCAAGTAAATGTTTATTTGCTCGTTGAGTGGAA  | 1200 |
| Pokkali OsHKT1;1 Genomic DNA | 1088 | CTCAGAGAGCTTAGAGGGAATGAATGGTTACAGAAATGGTAGGATTAATTTCCAGAG     | 1147 |
| OsHKT1;1-FL                  | 1201 | CTCAGAGAGCTTAGAGGGAATGAATGGTTACAGAAATGGTAGGATTAATTTCCAGAG     | 1260 |
| Pokkali OsHKT1;1 Genomic DNA | 1148 | TGTTAATACAAGACAAGCCGGTGAATCTATCCTTTGATATATCAACACTTTCTCCATCAAC | 1207 |
| OsHKT1;1-FL                  | 1261 | TGTTAATACAAGACAAGCCGGTGAATCTATCCTTTGATATATCAACACTTTCTCCATCAAC | 1320 |
| Pokkali OsHKT1;1 Genomic DNA | 1208 | TCTGTTGCTATTTGCAGTGTGATGATGATCTCTCCAAACCCCTGTCTTAAATGAAT      | 1267 |
| OsHKT1;1-FL                  | 1321 | TCTGTTGCTATTTGCAGTGTGATGATGATGATCTCTCCAAACCCCTGTCTTAAATGAAT   | 1346 |
| Pokkali OsHKT1;1 Genomic DNA | 1268 | TTAACTAAATCAGTAGAACACTTAGATTAGTTATTTACTGGAACATAACAATAATCAGGA  | 1327 |
| OsHKT1;1-FL                  | 1346 | TTAACTAAATCAGTAGAACACTTAGATTAGTTATTTACTGGAACATAACAATAATCAGGA  | 1346 |
| Pokkali OsHKT1;1 Genomic DNA | 1328 | GAAACTGTTGGAAAATTTGATAGCTTCATCATTATAAAGTTGAAGATTACTAAACACAT   | 1387 |
| OsHKT1;1-FL                  | 1346 | GAAACTGTTGGAAAATTTGATAGCTTCATCATTATAAAGTTGAAGATTACTAAACACAT   | 1346 |
| Pokkali OsHKT1;1 Genomic DNA | 1388 | GCATTCATGACCACTGCAGCTTGCTAGGTTTATCGATTTTATACGTCACCGAAATAGTA   | 1447 |
| OsHKT1;1-FL                  | 1346 | GCATTCATGACCACTGCAGCTTGCTAGGTTTATCGATTTTATACGTCACCGAAATAGTA   | 1346 |
| Pokkali OsHKT1;1 Genomic DNA | 1448 | GTTATGAACCTCAAATCTGCATCTAAATAACTACTGTTGAATAGAGAAAGTGAGACTACT  | 1507 |
| OsHKT1;1-FL                  | 1346 | GTTATGAACCTCAAATCTGCATCTAAATAACTACTGTTGAATAGAGAAAGTGAGACTACT  | 1346 |
| Pokkali OsHKT1;1 Genomic DNA | 1508 | TTGAACAAATAGGACAGAACTTCTGACAAGGTTTAAATGAAAAGTAGGCAGCATAACAAC  | 1567 |
| OsHKT1;1-FL                  | 1346 | TTGAACAAATAGGACAGAACTTCTGACAAGGTTTAAATGAAAAGTAGGCAGCATAACAAC  | 1346 |
| Pokkali OsHKT1;1 Genomic DNA | 1568 | ATGTTTTATGTGGAAACAGCATGTTTCTACTCCTTGTTTAACAGATAATCAACTTGCTTGC | 1627 |
| OsHKT1;1-FL                  | 1346 | ATGTTTTATGTGGAAACAGCATGTTTCTACTCCTTGTTTAACAGATAATCAACTTGCTTGC | 1346 |
| Pokkali OsHKT1;1 Genomic DNA | 1628 | AGGTACCTTCCCTCCGATGCTTCATTTCTCAGTCCCAATGCTGATAACCGCCCTTGACA   | 1687 |
| OsHKT1;1-FL                  | 1347 | ----ACCTTCCCTCCGATGCTTCATTTCTCAGTCCCAATGCTGATAACCGCCCTTGACA   | 1402 |
| Pokkali OsHKT1;1 Genomic DNA | 1688 | GATAAAAAGACAACCTCGATTAGCAGAGCACTGTGGAGGAATTTACCGTTAACAAAGCTT  | 1747 |
| OsHKT1;1-FL                  | 1403 | GATAAAAAGACAACCTCGATTAGCAGAGCACTGTGGAGGAATTTACCGTTAACAAAGCTT  | 1462 |
| Pokkali OsHKT1;1 Genomic DNA | 1748 | TCTTGTGTTAGCAATGTTCAATTTCTGGCATGCATAACAGAAAGGAGTCAATTTCTTCT   | 1807 |
| OsHKT1;1-FL                  | 1463 | TCTTGTGTTAGCAATGTTCAATTTCTGGCATGCATAACAGAAAGGAGTCAATTTCTTCT   | 1522 |
| Pokkali OsHKT1;1 Genomic DNA | 1808 | GATCCACTAAATTTCAACATCTTCAGCATAGTTTTTGGAGATAATCAGGCAAGTTACATC  | 1867 |
| OsHKT1;1-FL                  | 1523 | GATCCACTAAATTTCAACATCTTCAGCATAGTTTTTGGAGATAATCAGGCAAGTTACATC  | 1569 |
| Pokkali OsHKT1;1 Genomic DNA | 1868 | CTTTTTTTTGTGCTGCCATAACAGAAACTATGGCTACATCAAATTACATCACTGAAA     | 1927 |
| OsHKT1;1-FL                  | 1569 | CTTTTTTTTGTGCTGCCATAACAGAAACTATGGCTACATCAAATTACATCACTGAAA     | 1569 |
| Pokkali OsHKT1;1 Genomic DNA | 1928 | TCCGAATTGCCTAGTATGATCACTAAGAACCAGTGAACCCAGCATAATTAATTTGCAAGA  | 1987 |
| OsHKT1;1-FL                  | 1569 | TCCGAATTGCCTAGTATGATCACTAAGAACCAGTGAACCCAGCATAATTAATTTGCAAGA  | 1569 |
| Pokkali OsHKT1;1 Genomic DNA | 1988 | ACATATCAAATCTACGACCTGTCATTTTTTTTCTTTTTTGGTTGCTTACAAGCAACAG    | 2047 |
| OsHKT1;1-FL                  | 1569 | ACATATCAAATCTACGACCTGTCATTTTTTTTCTTTTTTGGTTGCTTACAAGCAACAG    | 1569 |
| Pokkali OsHKT1;1 Genomic DNA | 2048 | AAATAACGCCATTTTATTTCCACAGCGCTTTCGCAATGTAGGCTACTACTAGGATACA    | 2107 |
| OsHKT1;1-FL                  | 1570 | -----CGCTTTCGCAATGTAGGCTACTACTAGGATACA                        | 1604 |
| Pokkali OsHKT1;1 Genomic DNA | 2108 | GTTGCCAGAAGTGTGTAAGCCTGATGCCAATTCGAAAGATGCTTCCTACGGGTTCTGTCG  | 2167 |
| OsHKT1;1-FL                  | 1605 | GTTGCCAGAAGTGTGTAAGCCTGATGCCAATTCGAAAGATGCTTCCTACGGGTTCTGTCG  | 1664 |
| Pokkali OsHKT1;1 Genomic DNA | 2168 | GCAGGTGGACCCGAGGAGGTAAGCTGATAGT-----                          | 2198 |
| OsHKT1;1-FL                  | 1665 | GCAGGTGGACCCGAGGAGGTAAGCTGATAGT-----                          | 1724 |
| Pokkali OsHKT1;1 Genomic DNA | 2198 | -----                                                         | 2198 |
| OsHKT1;1-FL                  | 1725 | AGGAGTTCATCCTGAAATGAAGCGCCGCGACGGTACCACATAAACCCGCTCAAGAACAC   | 1784 |
| Pokkali OsHKT1;1 Genomic DNA | 2198 | -----                                                         | 2198 |
| OsHKT1;1-FL                  | 1785 | CCGAATGGAGTCTCTAAGCTACATAATACCAACTTACACTTACAAAA               | 1831 |

## Supplement Figure S2.

Nucleotide sequence alignment of Pokkali OsHKT1;1 genomic DNA and full-length cDNA. GENETYX ver. 13 was used for exon-intron analysis.

```
OshKT1,1-FL 0 ----- 0
OshKT1,1-V1 0 ----- 0
OshKT1,1-V2 0 ----- 0
OshKT1,1-V3 0 ----- 0
OshKT1,1-V4 0 ----- 0
OshKT1,1-V5 0 ----- 0
OshKT1,1-V6 1 AACAGCTATGACCATGATACGCCAAGCGCGCAATTACCTTCACTAAAGGGAACAAAAGCT 60
OshKT1,1-V7 1 -----ACCTTCACTAAAGGGAACAAAAGCT 25
OshKT1,1-V8 0 ----- 0

OshKT1,1-FL 1 -----GGGCCCCCTCGAGGTCGACGGTATCGATAAGCTTGCTTGTCTTTTTCGAG 51
OshKT1,1-V1 1 -----CCCTCGAGGTCGACGGTATCGATAAGCTTGCTTGTCTTTTTCGAG 47
OshKT1,1-V2 1 -----CCCTCGAGGTCGACGGTATCGATAAGCTTGCTTGTCTTTTTCGAG 49
OshKT1,1-V3 1 -----GGGCCCCCTCGAGGTCGACGGTATCGATAAGCTTGCTTGTCTTTTTCGAG 51
OshKT1,1-V4 1 -----CCCTCGAGGTCGACGGTATCGATAAGCTTGCTTGTCTTTTTCGAG 48
OshKT1,1-V5 1 -----CCCTCGAGGTCGACGGTATCGATAAGCTTGCTTGTCTTTTTCGAG 45
OshKT1,1-V6 61 GGGTACCGGGCCCCCTCGAGGTCGACGGTATCGATAAGCTTGCTTGTCTTTTTCGAG 120
OshKT1,1-V7 26 GGGTACCGGGCCCCCTCGAGGTCGACGGTATCGATAAGCTTGCTTGTCTTTTTCGAG 85
OshKT1,1-V8 1 -----CCCTCGAGGTCGACGGTATCGATAAGCTTGCTTGTCTTTTTCGAG 46

OshKT1,1-FL 52 AAGCTCAGAATAAACGCTCAACTTTGGCAGAACCATGCAATCCACCAAGTTTAGTGCTAGA 111
OshKT1,1-V1 48 AAGCTCAGAATAAACGCTCAACTTTGGCAGAACCATGCAATCCACCAAGTTTAGTGCTAGA 107
OshKT1,1-V2 50 AAGCTCAGAATAAACGCTCAACTTTGGCAGAACCATGCAATCCACCAAGTTTAGTGCTAGA 109
OshKT1,1-V3 52 AAGCTCAGAATAAACGCTCAACTTTGGCAGAACCATGCAATCCACCAAGTTTAGTGCTAGA 111
OshKT1,1-V4 49 AAGCTCAGAATAAACGCTCAACTTTGGCAGAACCATGCAATCCACCAAGTTTAGTGCTAGA 108
OshKT1,1-V5 46 AAGCTCAGAATAAACGCTCAACTTTGGCAGAACCATGCAATCCACCAAGTTTAGTGCTAGA 105
OshKT1,1-V6 121 AAGCTCAGAATAAACGCTCAACTTTGGCAGAACCATGCAATCCACCAAGTTTAGTGCTAGA 180
OshKT1,1-V7 86 AAGCTCAGAATAAACGCTCAACTTTGGCAGAACCATGCAATCCACCAAGTTTAGTGCTAGA 145
OshKT1,1-V8 47 AAGCTCAGAATAAACGCTCAACTTTGGCAGAACCATGCAATCCACCAAGTTTAGTGCTAGA 106

OshKT1,1-FL 112 TACCTTGAAGCGTATCAAACATACATAGCCATGAAGCTCCTGTTACCGAATTCGGAGGT 171
OshKT1,1-V1 108 TACCTTGAAGCGTATCAAACATACATAGCCATGAAGCTCCTGTTACCGAATTCGGAGGT 167
OshKT1,1-V2 110 TACCTTGAAGCGTATCAAACATACATAGCCATGAAGCTCCTGTTACCGAATTCGGAGGT 169
OshKT1,1-V3 112 TACCTTGAAGCGTATCAAACATACATAGCCATGAAGCTCCTGTTACCGAATTCGGAGGT 171
OshKT1,1-V4 109 TACCTTGAAGCGTATCAAACATACATAGCCATGAAGCTCCTGTTACCGAATTCGGAGGT 168
OshKT1,1-V5 106 TACCTTGAAGCGTATCAAACATACATAGCCATGAAGCTCCTGTTACCGAATTCGGAGGT 165
OshKT1,1-V6 181 TACCTTGAAGCGTATCAAACATACATAGCCATGAAGCTCCTGTTACCGAATTCGGAGGT 240
OshKT1,1-V7 146 TACCTTGAAGCGTATCAAACATACATAGCCATGAAGCTCCTGTTACCGAATTCGGAGGT 205
OshKT1,1-V8 107 TACCTTGAAGCGTATCAAACATACATAGCCATGAAGCTCCTGTTACCGAATTCGGAGGT 166

OshKT1,1-FL 172 GCTTCGGATCTATTGGGAGAAAGCTCAGCATCTCTGTGGGTTCTCTCCATGAAGCTCAT 231
OshKT1,1-V1 168 GCTTCGGATCTATTGGGAGAAAGCTCAGCATCTCTGTGGGTTCTCTCCATGAAGCTCAT 227
OshKT1,1-V2 170 GCTTCGGATCTATTGGGAGAAAGCTCAGCATCTCTGTGGGTTCTCTCCATGAAGCTCAT 229
OshKT1,1-V3 172 GCTTCGGATCTATTGGGAGAAAGCTCAGCATCTCTGTGGGTTCTCTCCATGAAGCTCAT 231
OshKT1,1-V4 169 GCTTCGGATCTATTGGGAGAAAGCTCAGCATCTCTGTGGGTTCTCTCCATGAAGCTCAT 228
OshKT1,1-V5 166 GCTTCGGATCTATTGGGAGAAAGCTCAGCATCTCTGTGGGTTCTCTCCATGAAGCTCAT 225
OshKT1,1-V6 241 GCTTCGGATCTATTGGGAGAAAGCTCAGCATCTCTGTGGGTTCTCTCCATGAAGCTCAT 300
OshKT1,1-V7 206 GCTTCGGATCTATTGGGAGAAAGCTCAGCATCTCTGTGGGTTCTCTCCATGAAGCTCAT 265
OshKT1,1-V8 167 GCTTCGGATCTATTGGGAGAAAGCTCAGCATCTCTGTGGGTTCTCTCCATGAAGCTCAT 226

OshKT1,1-FL 232 TTCCAGAGCCAGATGTGTGGCAAGTTCTGTCAACAATCTTACAGTTTTCTGGTTTGC 291
OshKT1,1-V1 228 TTCCAGAGCCAGATGTGT----- 245
OshKT1,1-V2 230 TTCCAGAGCCAGATGTGT----- 248
OshKT1,1-V3 232 TTCCAGAGCCAGATGTGTGGCAAGTTCTGTCAACAATCTTACAGTTTTCTGGTTTGC 291
OshKT1,1-V4 229 TTCCAGAGCCAGATGTGTGGCAAGTTCTGTCAACAATCTTACAGTTTTCTGGTTTGC 288
OshKT1,1-V5 226 TTCCAGAGCCAGATGTGT----- 243
OshKT1,1-V6 301 TTCCAGAGCCAGATGTGTGGCAAGTTCTGTCAACAATCTTACAGTTTTCTGGTTTGC 360
OshKT1,1-V7 266 TTCCAGAGCCAGATGTGT----- 283
OshKT1,1-V8 227 TTCCAGAGCCAGATGTGT----- 244

OshKT1,1-FL 292 AAGTAACCCCTTTGGTAGTTCAGTCGTTTACTTTGTGATAAATCTCATTGGCTGGTTTCC 351
OshKT1,1-V1 245 ----- 245
OshKT1,1-V2 248 ----- 248
OshKT1,1-V3 292 AAGTAACCCCTTTGGTAGTTCAGTCGTTTACTTTGTGATAAATCTCATTGGCTGGTTTCC 351
OshKT1,1-V4 289 AAGTAACCCCTTTGGTAGTTCAGTCGTTTACTTTGTGATAAATCTCATTGGCTGGTTTCC 348
OshKT1,1-V5 243 ----- 243
OshKT1,1-V6 361 AAGTAACCCCTTTGGTAGTTCAGTCGTTTACTTTGTGATAAATCTCATTGGCTGGTTTCC 420
OshKT1,1-V7 283 ----- 283
OshKT1,1-V8 244 ----- 244

OshKT1,1-FL 352 TGGCTCTGAGAATCTCAAGCCCCAGGGTAAGCCAGGTCCAAAGGATTTGGACCTGTTGTT 411
OshKT1,1-V1 246 -----GAATCTCAAGCCCCAGGGTAAGCCAGGTCCAAAGGATTTGGACCTGTTGTT 296
OshKT1,1-V2 249 -----AATCTCAAGCCCCAGGGTAAGCCAGGTCCAAAGGATTTGGACCTGTTGTT 298
OshKT1,1-V3 352 TGCTCTGAAGAATCTCAAGCCCCAGGGTAAGCCAGGTCCAAAGGATTTGGACCTGTTGTT 411
OshKT1,1-V4 349 TGCTCTGAAGAATCTCAAGCCCCAGGGTAAGCCAGGTCCAAAGGATTTGGACCTGTTGTT 408
OshKT1,1-V5 244 -----GAATCTCAAGCCCCAGGGTAAGCCAGGTCCAAAGGATTTGGACCTGTTGTT 294
OshKT1,1-V6 421 TGCTCTGAAGAATCTCAAGCCCCAGGGTAAGCCAGGTCCAAAGGATTTGGACCTGTTGTT 480
OshKT1,1-V7 284 -----GAATCTCAAGCCCCAGGGTAAGCCAGGTCCAAAGGATTTGGACCTGTTGTT 334
OshKT1,1-V8 245 -----GAATCTCAAGCCCCAGGGTAAGCCAGGTCCAAAGGATTTGGACCTGTTGTT 295

OshKT1,1-FL 412 CACCTCTGTGTCTACACTTACTGTCTCGAGCATGGCAACAGTAGAGATGGAAGACTTATC 471
OshKT1,1-V1 297 CACCTCTGTGTCTACACTTACTGTCTCGAGCATGGCAACAGTAGAGATGGAAGACTTATC 356
OshKT1,1-V2 299 CACCTCTGTGTCTACACTTACTGTCTCGAGCATGGCAACAGTAGAGATGGAAGACTTATC 358
OshKT1,1-V3 412 CACCTCTGTGTCTACACTTACTGTCTCGAGCATGGCAACAGTAGAGATGGAAGACTTATC 471
OshKT1,1-V4 409 CACCTCTGTGTCTACACTTACTGTCTCGAGCATGGCAACAGTAGAGATGGAAGACTTATC 468
OshKT1,1-V5 295 CACCTCTGTGTCTACACTTACTGTCTCGAGCATGGCAACAGTAGAGATGGAAGACTTATC 354
OshKT1,1-V6 481 CACCTCTGTGTCTACACTTACTGTCTCGAGCATGGCAACAGTAGAGATGGAAGACTTATC 540
OshKT1,1-V7 335 CACCTCTGTGTCTACACTTACTGTCTCGAGCATGGCAACAGTAGAGATGGAAGACTTATC 394
OshKT1,1-V8 296 CACCTCTGTGTCTACACTTACTGTCTCGAGCATGGCAACAGTAGAGATGGAAGACTTATC 355

OshKT1,1-FL 472 TGACAGGCAACTCTGGGTTCTGATCCTCTGATGCTAATGGGAGGAGAGGTTTCCACATC 531
OshKT1,1-V1 357 TGACAGGCAACTCTGGGTTCTGATCCTCTGATGCTAATGGGAGGAGAGGTTTCCACATC 416
OshKT1,1-V2 359 TGACAGGCAACTCTGGGTTCTGATCCTCTGATGCTAATGGGAGGAGAGGTTTCCACATC 418
OshKT1,1-V3 472 TGACAGGCAACTCTGGGTTCTGATCCTCTGATGCTAATGGGAGGAGAGGTTTCCACATC 531
OshKT1,1-V4 469 TGACAGGCAACTCTGGGTTCTGATCCTCTGATGCTAATGGGAGGAGAGGTTTCCACATC 528
OshKT1,1-V5 355 TGACAGGCAACTCTGGGTTCTGATCCTCTGATGCTAATGGGAGGAGAGGTTTCCACATC 414
OshKT1,1-V6 541 TGACAGGCAACTCTGGGTTCTGATCCTCTGATGCTAATGGGAGGAGAGGTTTCCACATC 600
OshKT1,1-V7 395 TGACAGGCAACTCTGGGTTCTGATCCTCTGATGCTAATGGGAGGAGAGGTTTCCACATC 454
OshKT1,1-V8 356 TGACAGGCAACTCTGGGTTCTGATCCTCTGATGCTAATGGGAGGAGAGGTTTCCACATC 415

OshKT1,1-FL 532 AATGCTAGGGCTTACTTCAACAATGCCAATGCCAACAGAAATGAGAACAGCCAGAGAAG 591
OshKT1,1-V1 417 AATGCTAGGGCTTACTTCAACAATGCCAATGCCAACAGAAATGAGAACAGCCAGAGAAG 476
OshKT1,1-V2 419 AATGCTAGGGCTTACTTCAACAATGCCAATGCCAACAGAAATGAGAACAGCCAGAGAAG 478
OshKT1,1-V3 532 AATGCTAGGGCTTACTTCAACAATGCCAATGCCAACAGAAATGAGAACAGCCAGAGAAG 591
OshKT1,1-V4 529 AATGCTAGGGCTTACTTCAACAATGCCAATGCCAACAGAAATGAGAACAGCCAGAGAAG 588
OshKT1,1-V5 415 AATGCTAGGGCTTACTTCAACAATGCCAATGCCAACAGAAATGAGAACAGCCAGAGAAG 474
OshKT1,1-V6 601 AATGCTAGGGCTTACTTCAACA----- 623
OshKT1,1-V7 455 AATGCTAGGGCTTACTTCAACAATGCCAATGCCAACAGAAATGAGAACAGCCAGAGAAG 514
OshKT1,1-V8 416 AATGCTAGGGCTTACTTCAACAATGCCAATGCCAACAGAAATGAGAACAGCCAGAGAAG 475

OshKT1,1-FL 592 TTTACCTTCAATCAGCTTGGACATTGAATCCAAACAGTCTTCCAAACAATGGGGATCACAA 651
OshKT1,1-V1 477 TTTACCTTCAATCAGCTTGGACATTGAATCCAAACAGTCTTCCAAACAATGGGGATCACAA 536
OshKT1,1-V2 479 TTTACCTTCAATCAGCTTGGACATTGAATCCAAACAGTCTTCCAAACAATGGGGATCACAA 538
OshKT1,1-V3 592 TTTACCTTCAATCAGCTTGGACATTGAATCCAAACAGTCTTCCAAACAATGGGGATCACAA 651
OshKT1,1-V4 589 TTTACCTTCAATCAGCTTGGACATTGAATCCAAACAGTCTTCCAAACAATGGGGATCACAA 648
OshKT1,1-V5 475 TTTACCTTCAATCAGCTTGGACATTGAATCCAAACAGTCTTCCAAACAATGGGGATCACAA 534
OshKT1,1-V6 623 ----- 623
OshKT1,1-V7 515 TTTACCTTCAATCAGCTTGGACATTGAATCCAAACAGTCTTCCAAACAATGGGGATCACAA 574
OshKT1,1-V8 476 TTTACCTTCAATCAGCTTGGACATTGAATCCAAACAGTCTTCCAAACAATGGGGATCACAA 535

OshKT1,1-FL 652 AATTACGGAAATGTGGCCAAATCAGAAAGAACTATGTCCGAAAACAGGTACAGCAAAACAA 711
OshKT1,1-V1 537 AATTACGGAAATGTGGCCAAATCAGAAAGAACTATGTCCGAAAACAGGTACAGCAAAACAA 596
OshKT1,1-V2 539 AATTACGGAAATGTGGCCAAATCAGAAAGAACTATGTCCGAAAACAGGTACAGCAAAACAA 581
OshKT1,1-V3 652 AATTACGGAAATGTGGCCAAATCAGAAAGAACTATGTCCGAAAACAGGTACAGCAAAACAA 707
OshKT1,1-V4 649 AATTACGGAAATGTGGCCAAATCAGAAAGAACTATGTCCGAAAACAGGTACAGCAAAACAA 698
OshKT1,1-V5 535 AATTACGGAAATGTGGCCAAATCAGAAAGAACTATGTCCGAAAACAGGTACAGCAAAACAA 580
OshKT1,1-V6 623 ----- 623
OshKT1,1-V7 575 AATTACGGAAATGTGGCCAAATCAGAAAGAACTATGTCCGAAAACAGGTACAGCAAAACAA 620
OshKT1,1-V8 536 AATTACGGAAATGTGGCCAAATCAGAAAGAACTATGTCCGAAAACAGGTACAGCAAAACAA 571
```

OsHKT1;1-FL 712 AAGCATAACATATAATCCTTGGCGTGTGTTGGTTCCGATAGTGACAGGTTATTTCGTAGC 771 M3  
OsHKT1;1-V1 597 AAGCATAACATATAATCCTTGGCGTGTGTTGGTTCCGATAGTGACAGGTTATTTCGTAGC 656  
OsHKT1;1-V2 581 ----- 581  
OsHKT1;1-V3 707 ----- 707  
OsHKT1;1-V4 698 ----- 698  
OsHKT1;1-V5 580 ----- 580  
OsHKT1;1-V6 623 ----- 623  
OsHKT1;1-V7 620 ----- 620  
OsHKT1;1-V8 571 ----- 571  
OsHKT1;1-FL 772 TACTGTCATTTCCAGTTCTGTGCATCATTATTATTACTTTGGATTGATTCAGATGCAAG 831  
OsHKT1;1-V1 657 TACTGTCATTTCCAGTTCTGTGCATCATTATTATTACTTTGGATTGATTCAGATGCAAG 716  
OsHKT1;1-V2 582 ----- 591  
OsHKT1;1-V3 707 ----- 707  
OsHKT1;1-V4 698 ----- 698  
OsHKT1;1-V5 580 ----- 580  
OsHKT1;1-V6 623 ----- 623  
OsHKT1;1-V7 620 ----- 620  
OsHKT1;1-V8 571 ----- 571  
OsHKT1;1-FL 832 AANTGTACTGAAAAGTAAGGACATCAGTATGTATACCTTTTGCATCTTCACAGCAGCTCTC 891 Stop codon M4  
OsHKT1;1-V1 717 AANTGTACTGAAAAGTAAGGAGATCAGTATGTATACCTTTTGCATCTTCACAGCAGCTCTC 776  
OsHKT1;1-V2 592 AANTGTACTGAAAAGTAAGGAGATCAGTATGTATACCTTTTGCATCTTCACAGCAGCTCTC 651  
OsHKT1;1-V3 708 ---TGTACTGAAAAGTAAGGAGATCAGTATGTATACCTTTTGCATCTTCACAGCAGCTCTC 764  
OsHKT1;1-V4 698 ----- 698  
OsHKT1;1-V5 580 ----- 580  
OsHKT1;1-V6 623 ----- 623  
OsHKT1;1-V7 620 ----- 620  
OsHKT1;1-V8 571 ----- 571  
OsHKT1;1-FL 892 CTCGTTGCAAACTGTGGCTTCAGCCACTAAATAGTAACATGCAACCCCTCAGAAAACA 951  
OsHKT1;1-V1 777 CTCGTTGCAAACTGTGGCTTCAGCCACTAAATAGTAACATGCAACCCCTCAGAAAACA 836  
OsHKT1;1-V2 652 CTCGTTGCAAACTGTGGCTTCAGCCACTAAATAGTAACATGCAACCCCTCAGAAAACA 711  
OsHKT1;1-V3 765 CTCGTTGCAAACTGTGGCTTCAGCCACTAAATAGTAACATGCAACCCCTCAGAAAACA 824  
OsHKT1;1-V4 698 ----- 698  
OsHKT1;1-V5 580 ----- 580  
OsHKT1;1-V6 623 ----- 623  
OsHKT1;1-V7 620 ----- 620  
OsHKT1;1-V8 571 ----- 571  
OsHKT1;1-FL 952 CTGGTCCCTTTTGGCTCCTAGTATCCCGCAGATCTAGCAGGCAATACCTTGTTCACCC 1011 M5  
OsHKT1;1-V1 837 CTGGTCCCTTTTGGCTCCTAGTATCCCGCAGATCTAGCAGGCAATACCTTGTTCACCC 896  
OsHKT1;1-V2 712 CTGGTCCCTTTTGGCTCCTAGTATCCCGCAGATCTAGCAGGCAATACCTTGTTCACCC 771  
OsHKT1;1-V3 825 CTGGTCCCTTTTGGCTCCTAGTATCCCGCAGATCTAGCAGGCAATACCTTGTTCACCC 884  
OsHKT1;1-V4 698 ----- 698  
OsHKT1;1-V5 580 ----- 580  
OsHKT1;1-V6 623 ----- 623  
OsHKT1;1-V7 620 ----- 620  
OsHKT1;1-V8 571 ----- 571  
OsHKT1;1-FL 1012 ACTCTTTCGGCTATGCGTATGGGTTTTGGGAAGTCAAGTGGAAAAGCAGAGTATGCTTA 1071  
OsHKT1;1-V1 897 ACTCTTTCGGCTATGCGTATGGGTTTTGGGAAGTCAAGTGGAAAAGCAGAGTATGCTTA 956  
OsHKT1;1-V2 772 ACTCTTTCGGCTATGCGTATGGGTTTTGGGAAGTCAAGTGGAAAAGCAGAGTATGCTTA 831  
OsHKT1;1-V3 885 ACTCTTTCGGCTATGCGTATGGGTTTTGGGAAGTCAAGTGGAAAAGCAGAGTATGCTTA 944  
OsHKT1;1-V4 698 ----- 698  
OsHKT1;1-V5 580 ----- 580  
OsHKT1;1-V6 623 ----- 623  
OsHKT1;1-V7 620 ----- 620  
OsHKT1;1-V8 571 ----- 571  
OsHKT1;1-FL 1072 CATCCTTCAGCATCCTGGGGAGACTGGCTACAAACATTTGCATGTGAGGAGAAATCTCTGT 1131  
OsHKT1;1-V1 957 CATCCTTCAGCATCCTGGGGAGACTGGCTACAAACATTTGCATGTGAGGAGAAATCTCTGT 1016  
OsHKT1;1-V2 832 CATCCTTCAGCATCCTGGGGAGACTGGCTACAAACATTTGCATGTGAGGAGAAATCTCTGT 891  
OsHKT1;1-V3 945 CATCCTTCAGCATCCTGGGGAGACTG----- 970  
OsHKT1;1-V4 698 ----- 698  
OsHKT1;1-V5 580 ----- 580  
OsHKT1;1-V6 623 ----- 623  
OsHKT1;1-V7 620 ----- 620  
OsHKT1;1-V8 571 ----- 571  
OsHKT1;1-FL 1132 TTACATTCGTTCTGAGTGTACTGGACTGATTCTACGCAAGTAATGTTTATTTGGCTCGTT 1191 M6  
OsHKT1;1-V1 1017 TTACATTCGTTCTGAGTGTACTGGACTGATTCTACGCAAGTAATGTTTATTTGGCTCGTT 1076  
OsHKT1;1-V2 892 TTACATTCGTTCTGAGTGTACTGGACTGATTCTACGCAAGTAATGTTTATTTGGCTCGTT 951  
OsHKT1;1-V3 970 ----- 970  
OsHKT1;1-V4 698 ----- 698  
OsHKT1;1-V5 580 ----- 580  
OsHKT1;1-V6 623 ----- 623  
OsHKT1;1-V7 620 ----- 620  
OsHKT1;1-V8 571 ----- 571  
OsHKT1;1-FL 1192 TGAGTGGAACTCAGAGACTTAGAGGGAATGAATGGTTACAGAAATGGTAGGATTATT 1251  
OsHKT1;1-V1 1077 TGAGTGGAACTCAGAGACTTAGAGGGAATGAATGGTTACAGAAATGGTAGGATTATT 1136  
OsHKT1;1-V2 952 TGAGTGGAACTCAGAGACTTAGAGGGAATGAATGGTTACAGAAATGGTAGGATTATT 1011  
OsHKT1;1-V3 970 ----- 970  
OsHKT1;1-V4 698 ----- 698  
OsHKT1;1-V5 580 ----- 580  
OsHKT1;1-V6 623 ----- 623  
OsHKT1;1-V7 620 ----- 620  
OsHKT1;1-V8 571 ----- 571  
OsHKT1;1-FL 1252 ATTCAGAGTGTAAATACAAGACAAGCCGGTGAATCTATCCTTGATATATCAACACTTTC 1311  
OsHKT1;1-V1 1137 ATTCAGAGTGTAAATACAAGACAAGCCGGTGAATCTATCCTTGATATATCAACACTTTC 1196  
OsHKT1;1-V2 1012 ATTCAGAGTGTAAATACAAGACAAGCCGGTGAATCTATCCTTGATATATCAACACTTTC 1071  
OsHKT1;1-V3 970 ----- 970  
OsHKT1;1-V4 698 ----- 698  
OsHKT1;1-V5 580 ----- 580  
OsHKT1;1-V6 623 ----- 623  
OsHKT1;1-V7 620 ----- 620  
OsHKT1;1-V8 571 ----- 571  
OsHKT1;1-FL 1312 TCCATCAACTCTGTGCTATTTGCACTCGTCATGTACCTTCCTCCGATGCTTCATTCTC 1371 M7  
OsHKT1;1-V1 1197 TCCATCAACTCTGTGCTATTTGCACTCGTCATGTACCTTCCTCCGATGCTTCATTCTC 1256  
OsHKT1;1-V2 1072 TCCATCAACTCTGTGCTATTTGCACTCGTCATGTACCTTCCTCCGATGCTTCATTCTC 1131  
OsHKT1;1-V3 971 -----GTCACAAACATTG-CATGTACCTTCCTCCGATGCTTCATTCTC 1014  
OsHKT1;1-V4 699 -----CTTCTCCGATGCTTCATTCTC 721  
OsHKT1;1-V5 581 -----CTTCTCCGATGCTTCATTCTC 607  
OsHKT1;1-V6 623 ----- 623  
OsHKT1;1-V7 620 ----- 620  
OsHKT1;1-V8 571 ----- 571  
OsHKT1;1-FL 1372 CACTGCCAATGCTGATAACCGCCCTTGACAGATAAAAAGACAACCTCGATTAGCAGAGC 1431 Stop codon  
OsHKT1;1-V1 1257 CACTGCCAATGCTGATAACCGCCCTTGACAGATAAAAAGACAACCTCGATTAGCAGAGC 1316  
OsHKT1;1-V2 1132 CACTGCCAATGCTGATAACCGCCCTTGACAGATAAAAAGACAACCTCGATTAGCAGAGC 1191  
OsHKT1;1-V3 1015 CACTGCCAATGCTGATAACCGCCCTTGACAGATAAAAAGACAACCTCGATTAGCAGAGC 1074  
OsHKT1;1-V4 722 CACTGCCAATGCTGATAACCGCCCTTGACAGATAAAAAGACAACCTCGATTAGCAGAGC 781  
OsHKT1;1-V5 608 CACTGCCAATGCTGATAACCGCCCTTGACAGATAAAAAGACAACCTCGATTAGCAGAGC 667  
OsHKT1;1-V6 623 ----- 623  
OsHKT1;1-V7 620 ----- 620  
OsHKT1;1-V8 571 ----- 571  
OsHKT1;1-FL 1432 ACTGTGGAGGAATTTACCCTTAACAAGCTTCTTCTTTAGCAATGTTACACTTCCTGGC 1491 M8  
OsHKT1;1-V1 1317 ACTGTGGAGGAATTTACCCTTAACAAGCTTCTTCTTTAGCAATGTTACACTTCCTGGC 1376  
OsHKT1;1-V2 1192 ACTGTGGAGGAATTTACCCTTAACAAGCTTCTTCTTTAGCAATGTTACACTTCCTGGC 1251  
OsHKT1;1-V3 1075 ACTGTGGAGGAATTTACCCTTAACAAGCTTCTTCTTTAGCAATGTTACACTTCCTGGC 1134  
OsHKT1;1-V4 782 ACTGTGGAGGAATTTACCCTTAACAAGCTTCTTCTTTAGCAATGTTACACTTCCTGGC 841  
OsHKT1;1-V5 668 ACTGTGGAGGAATTTACCCTTAACAAGCTTCTTCTTTAGCAATGTTACACTTCCTGGC 727  
OsHKT1;1-V6 623 ----- 623  
OsHKT1;1-V7 620 ----- 620  
OsHKT1;1-V8 571 ----- 571

Stop codon

```

OsHKT1;1-FL 1492 ATGCATAAC-AGAAAGGAAGTCAATTCTTCTGATCCACTAAATTTCAACATCTTCAGCA 1550
OsHKT1;1-V1 1377 ATGCATAAC-AGAAAGGAAGTCAATTCTTCTGATCCACTAAATTTCAACATCTTCAGCA 1435
OsHKT1;1-V2 1252 ATGCATAAC-AGAAAGGAAGTCAATTCTTCTGATCCACTAAATTTCAACATCTTCAGCA 1310
OsHKT1;1-V3 1135 ATGCATAAC-AGAAAGGAAGTCAATTCTTCTGATCCACTAAATTTCAACATCTTCAGCA 1193
OsHKT1;1-V4 842 ATGCATAAC-AGAAAGGAAGTCAATTCTTCTGATCCACTAAATTTCAACATCTTCAGCA 900
OsHKT1;1-V5 728 ATGCATAAC-AGAAAGGAAGTCAATTCTTCTGATCCACTAAATTTCAACATCTTCAGCA 786
OsHKT1;1-V6 624 -----TCTTCAGCA 632
OsHKT1;1-V7 620 -----TCTTCAGCA 620
OsHKT1;1-V8 572 --GCAAAACCAGAAAGGAAGTCAATTCTTCTGATCCACTAAATTTCAACATCTTCAGCA 629
                                     M9
OsHKT1;1-FL 1551 TAGTTTTGAGATAATCAGCGCTTTCGGCAATGTAGGCTACTCACTAGGATACAGTTGCC 1610
OsHKT1;1-V1 1436 TAGTTTTGAGATAATCAGCGCTTTCGGCAATGTAGGCTACTCACTAGGATACAGTTGCC 1495
OsHKT1;1-V2 1311 TAGTTTTGAGATAATCAGCGCTTTCGGCAATGTAGGCTACTCACTAGGATACAGTTGCC 1370
OsHKT1;1-V3 1194 TAGTTTTGAGATAATCAGCGCTTTCGGCAATGTAGGCTACTCACTAGGATACAGTTGCC 1253
OsHKT1;1-V4 901 TAGTTTTGAGATAATCAGCGCTTTCGGCAATGTAGGCTACTCACTAGGATACAGTTGCC 960
OsHKT1;1-V5 787 TAGTTTTGAGATAATCAGCGCTTTCGGCAATGTAGGCTACTCACTAGGATACAGTTGCC 846
OsHKT1;1-V6 633 TAGTTTTGAGATAATCAGCGCTTTCGGCAATGTAGGCTACTCACTAGGATACAGTTGCC 692
OsHKT1;1-V7 621 -----CGCTTTCGGCAATGTAGGCTACTCACTAGGATACAGTTGCC 661
OsHKT1;1-V8 630 TAGTTTTGAGATAATCAGCGCTTTCGGCAATGTAGGCTACTCACTAGGATACAGTTGCC 689
                                     Stop codon
OsHKT1;1-FL 1611 AGAAGTTGTTGAAGCCTGATGCCACTTGCAAAAGATGCTTCCTACGGGTTCTCGCCGAGGT 1670
OsHKT1;1-V1 1496 AGAAGTTGTTGAAGCCTGATGCCACTTGCAAAAGATGCTTCCTACGGGTTCTCGCCGAGGT 1555
OsHKT1;1-V2 1371 AGAAGTTGTTGAAGCCTGATGCCACTTGCAAAAGATGCTTCCTACGGGTTCTCGCCGAGGT 1430
OsHKT1;1-V3 1254 AGAAGTTGTTGAAGCCTGATGCCACTTGCAAAAGATGCTTCCTACGGGTTCTCGCCGAGGT 1313
OsHKT1;1-V4 961 AGAAGTTGTTGAAGCCTGATGCCACTTGCAAAAGATGCTTCCTACGGGTTCTCGCCGAGGT 1020
OsHKT1;1-V5 847 AGAAGTTGTTGAAGCCTGATGCCACTTGCAAAAGATGCTTCCTACGGGTTCTCGCCGAGGT 906
OsHKT1;1-V6 693 AGAAGTTGTTGAAGCCTGATGCCACTTGCAAAAGATGCTTCCTACGGGTTCTCGCCGAGGT 752
OsHKT1;1-V7 662 AGAAGTTGTTGAAGCCTGATGCCACTTGCAAAAGATGCTTCCTACGGGTTCTCGCCGAGGT 721
OsHKT1;1-V8 690 AGAAGTTGTTGAAGCCTGATGCCACTTGCAAAAGATGCTTCCTACGGGTTCTCGCCGAGGT 749

OsHKT1;1-FL 1671 GGACCGAGGAGGGTAAGCTGATAGTTATCCCTGGTGTATGTTCCCTGGGAGGCTCAAGGAGT 1730
OsHKT1;1-V1 1556 GGACCGAGGAGGGTAAGCTGATAGTTATCCCTGGTGTATGTTCCCTGGGAGGCTCAAGGAGT 1615
OsHKT1;1-V2 1431 GGACCGAGGAGGGTAAGCTGATAGTTATCCCTGGTGTATGTTCCCTGGGAGGCTCAAGGAGT 1490
OsHKT1;1-V3 1314 GGACCGAGGAGGGTAAGCTGATAGTTATCCCTGGTGTATGTTCCCTGGGAGGCTCAAGGAGT 1373
OsHKT1;1-V4 1021 GGACCGAGGAGGGTAAGCTGATAGTTATCCCTGGTGTATGTTCCCTGGGAGGCTCAAGGAGT 1080
OsHKT1;1-V5 907 GGACCGAGGAGGGTAAGCTGATAGTTATCCCTGGTGTATGTTCCCTGGGAGGCTCAAGGAGT 966
OsHKT1;1-V6 753 GGACCGAGGAGGGTAAGCTGATAGTTATCCCTGGTGTATGTTCCCTGGGAGGCTCAAGGAGT 812
OsHKT1;1-V7 722 GGACCGAGGAGGGTAAGCTGATAGTTATCCCTGGTGTATGTTCCCTGGGAGGCTCAAGGAGT 781
OsHKT1;1-V8 750 GGACCGAGGAGGGTAAGCTGATAGTTATCCCTGGTGTATGTTCCCTGGGAGGCTCAAGGAGT 809
                                     Stop codon
OsHKT1;1-FL 1731 TCATCCTGAAATGAGCGGCCGCGACGGTACCCTAAACCAGCCTCAAGAACACCCGAAT 1790
OsHKT1;1-V1 1616 TCATCCTGAAATGAGCGGCCGCGACGGTACCCTAAACCAGCCTCAAGAACACCCGAAT 1675
OsHKT1;1-V2 1491 TCATCCTGAAATGAGCGGCCGCGACGGTACCCTAAACCAGCCTCAAGAACACCCGAAT 1550
OsHKT1;1-V3 1374 TCATCCTGAAATGAGCGGCCGCGACGGTACCCTAAACCAGCCTCAAGAACACCCGAAT 1433
OsHKT1;1-V4 1081 TCATCCTGAAATGAGCGGCCGCGACGGTACCCTAAACCAGCCTCAAGAACACCCGAAT 1140
OsHKT1;1-V5 967 TCATCCTGAAATGAGCGGCCGCGACGGTACCCTAAACCAGCCTCAAGAACACCCGAAT 1026
OsHKT1;1-V6 813 TCATCCTGAAATGAGCGGCCGCGACGGTACCCTAAACCAGCCTCAAGAACACCCGAAT 872
OsHKT1;1-V7 782 TCATCCTGAAATGAGCGGCCGCGACGGTACCCTAAACCAGCCTCAAGAACACCCGAAT 841
OsHKT1;1-V8 810 TCATCCTGAAATGAGCGGCCGCGACGGTACCCTAAACCAGCCTCAAGAACACCCGAAT 869

OsHKT1;1-FL 1791 GGAGTCTCTAAGCTACATAATACCAACTTACACTT-AC-AAAA----- 1831
OsHKT1;1-V1 1676 GGAGTCTCTAAGCTACATAATACCAACTTACACTT-AC-AAAA----- 1716
OsHKT1;1-V2 1551 GGAGTCTCTAAGCTACATAAT----- 1571
OsHKT1;1-V3 1434 GGAGTCTCTAAGCTACATA----- 1452
OsHKT1;1-V4 1141 GGAGTCTCTAAGCTACATAATACCAACTTACACTT-AC-AAAA----- 1181
OsHKT1;1-V5 1027 GGAGTCTCTAAGCTACATAATACCAACTTACACTT-AC-AAAA----- 1067
OsHKT1;1-V6 873 GGAGTCTCTAAGCTACATAATACCAACTTACACTTACAAAATGTTGTCCTCCCAAAATGTA 932
OsHKT1;1-V7 842 GGAGTCTCTAAGCTACATAATACCAACTTACACTTACNAAATGTTGTCCTCCCAAAATGTA 901
OsHKT1;1-V8 870 GGAGTCTCTAAGCTACATAATACCAACTTACACTTTAC-AAAATGTTGTCCTCCCAAAATGTA 928

OsHKT1;1-FL 1831 ----- 1831
OsHKT1;1-V1 1716 ----- 1716
OsHKT1;1-V2 1571 ----- 1571
OsHKT1;1-V3 1452 ----- 1452
OsHKT1;1-V4 1181 ----- 1181
OsHKT1;1-V5 1067 ----- 1067
OsHKT1;1-V6 933 GCCATTCGTATCTGCTCTAATAAAA 958
OsHKT1;1-V7 902 GCCATTCGTATCTGCTCT----- 920
OsHKT1;1-V8 929 GCC----- 931

```

**Supplementary Figure S3.**

Nucleotide sequence alignment of OsHKT1;1-FL and its eight variant using GENETYX ver. 13. Presumed membrane-spanning regions of OsHKT1;1-FL, and positions of start and stop codon for the full-length and variants are indicated.

|             |     |                                 |                    |                 |           |     |
|-------------|-----|---------------------------------|--------------------|-----------------|-----------|-----|
| OsHKT1;1-FL | 1   | MHPPSLVLDTLKRIKLYIAMKLLLPNSEVLR | IYWEKAQHLCGFLSMKLI | SRARC           | VSSVK     | 60  |
| OsHKT1;1-V1 | 1   | MHPPSLVLDTLKRIKLYIAMKLLLPNSEVLR | IYWEKAQHLCGFLSMKLI | SRARC           | VSSVK     | 55  |
| OsHKT1;1-V2 | 0   | -----                           | -----              | -----           | -----     | 0   |
| OsHKT1;1-V3 | 1   | MHPPSLVLDTLKRIKLYIAMKLLLPNSEVLR | IYWEKAQHLCGFLSMKLI | SRARC           | VSSVK     | 60  |
| OsHKT1;1-V4 | 1   | MHPPSLVLDTLKRIKLYIAMKLLLPNSEVLR | IYWEKAQHLCGFLSMKLI | SRARC           | VSSVK     | 60  |
| OsHKT1;1-V5 | 1   | MHPPSLVLDTLKRIKLYIAMKLLLPNSEVLR | IYWEKAQHLCGFLSMKLI | SRARC           | VSSVK     | 55  |
| OsHKT1;1-V6 | 1   | MHPPSLVLDTLKRIKLYIAMKLLLPNSEVLR | IYWEKAQHLCGFLSMKLI | SRARC           | VSSVK     | 60  |
| OsHKT1;1-V7 | 1   | MHPPSLVLDTLKRIKLYIAMKLLLPNSEVLR | IYWEKAQHLCGFLSMKLI | SRARC           | VSSVK     | 55  |
| OsHKT1;1-V8 | 1   | MHPPSLVLDTLKRIKLYIAMKLLLPNSEVLR | IYWEKAQHLCGFLSMKLI | SRARC           | VSSVK     | 55  |
| <b>M1</b>   |     |                                 |                    |                 |           |     |
| OsHKT1;1-FL | 61  | QSYSFLVCKSN                     | PLVVQLVYFV         | IISFAGFLAL      | KNLKPQ    | 60  |
| OsHKT1;1-V1 | 56  | -----                           | -----              | -----           | -----     | 83  |
| OsHKT1;1-V2 | 0   | -----                           | -----              | -----           | -----     | 0   |
| OsHKT1;1-V3 | 61  | QSYSFLVCKSN                     | PLVVQLVYFV         | IISFAGFLAL      | KNLKPQ    | 60  |
| OsHKT1;1-V4 | 61  | QSYSFLVCKSN                     | PLVVQLVYFV         | IISFAGFLAL      | KNLKPQ    | 60  |
| OsHKT1;1-V5 | 56  | -----                           | -----              | -----           | -----     | 83  |
| OsHKT1;1-V6 | 61  | QSYSFLVCKSN                     | PLVVQLVYFV         | IISFAGFLAL      | KNLKPQ    | 60  |
| OsHKT1;1-V7 | 56  | -----                           | -----              | -----           | -----     | 83  |
| OsHKT1;1-V8 | 56  | -----                           | -----              | -----           | -----     | 83  |
| <b>M2</b>   |     |                                 |                    |                 |           |     |
| OsHKT1;1-FL | 121 | ATVEMEDLSDRQ                    | LWVLILLMLMGGEVFT   | SMLGLYF         | NNANANRN  | 180 |
| OsHKT1;1-V1 | 84  | ATVEMEDLSDRQ                    | LWVLILLMLMGGEVFT   | SMLGLYF         | NNANANRN  | 143 |
| OsHKT1;1-V2 | 0   | -----                           | -----              | -----           | -----     | 0   |
| OsHKT1;1-V3 | 121 | ATVEMEDLSDRQ                    | LWVLILLMLMGGEVFT   | SMLGLYF         | NNANANRN  | 180 |
| OsHKT1;1-V4 | 121 | ATVEMEDLSDRQ                    | LWVLILLMLMGGEVFT   | SMLGLYF         | NNANANRN  | 180 |
| OsHKT1;1-V5 | 84  | ATVEMEDLSDRQ                    | LWVLILLMLMGGEVFT   | SMLGLYF         | NNANANRN  | 143 |
| OsHKT1;1-V6 | 121 | ATVEMEDLSDRQ                    | LWVLILLMLMGGEVFT   | SMLGLYF         | NNANANRN  | 156 |
| OsHKT1;1-V7 | 84  | ATVEMEDLSDRQ                    | LWVLILLMLMGGEVFT   | SMLGLYF         | NNANANRN  | 143 |
| OsHKT1;1-V8 | 84  | ATVEMEDLSDRQ                    | LWVLILLMLMGGEVFT   | SMLGLYF         | NNANANRN  | 143 |
| <b>M3</b>   |     |                                 |                    |                 |           |     |
| OsHKT1;1-FL | 181 | SPANNGDHKITECGSEETMSQ           | NQVQONKSI          | TYNPCA          | VLVR      | 240 |
| OsHKT1;1-V1 | 144 | SPANNGDHKITECGSEETMSQ           | NQVQONKSI          | TYNPCA          | ALVR      | 203 |
| OsHKT1;1-V2 | 1   | -----                           | -----              | -----           | -----     | 6   |
| OsHKT1;1-V3 | 181 | SPANNGDHKITECGSEETMSQ           | NQVQONKSI          | TYNPCA          | VLVR      | 209 |
| OsHKT1;1-V4 | 181 | SPANNGDHKITECGSEETMSQ           | NQVQONKSI          | TYNPCA          | ALVR      | 217 |
| OsHKT1;1-V5 | 144 | SPANNGDHKITECGSEETMSQ           | NQVQONKSI          | TYNPCA          | ALVR      | 180 |
| OsHKT1;1-V6 | 156 | -----                           | -----              | -----           | -----     | 156 |
| OsHKT1;1-V7 | 144 | SPANNGDHKITECGSEETMSQ           | NQVQONKSI          | TYNPCA          | ALVR      | 186 |
| OsHKT1;1-V8 | 144 | SPANNGDHKITECGSEETMSQ           | NQVQONKSI          | TYNPCA          | ALVR      | 176 |
| <b>M4</b>   |     |                                 |                    |                 |           |     |
| OsHKT1;1-FL | 241 | YFWIDSDARNVLKSKETISMYTFC        | IFTAVSSF           | ANCGFTPL        | NSNMQ     | 300 |
| OsHKT1;1-V1 | 204 | YFWIDSDARNVLKSKETISMYTFC        | IFTAVSSF           | ANCGFTPL        | NSNMQ     | 263 |
| OsHKT1;1-V2 | 7   | NYVAKPDARNVLKSKETISMYTFC        | IFTAVSSF           | ANCGFTPL        | NSNMQ     | 66  |
| OsHKT1;1-V3 | 209 | -----                           | -----              | -----           | -----     | 209 |
| OsHKT1;1-V4 | 217 | -----                           | -----              | -----           | -----     | 217 |
| OsHKT1;1-V5 | 180 | -----                           | -----              | -----           | -----     | 180 |
| OsHKT1;1-V6 | 156 | -----                           | -----              | -----           | -----     | 156 |
| OsHKT1;1-V7 | 186 | -----                           | -----              | -----           | -----     | 186 |
| OsHKT1;1-V8 | 176 | -----                           | -----              | -----           | -----     | 176 |
| <b>M5</b>   |     |                                 |                    |                 |           |     |
| OsHKT1;1-FL | 301 | LAGNTLFSPLLRL                   | LCVWVLGKVS         | GKAEYAYILQHPGET | GYKHLHVR  | 360 |
| OsHKT1;1-V1 | 264 | LAGNTLFSPLLRL                   | LCVWVLGKVS         | GKAEYAYILQHPGET | GYKHLHVR  | 323 |
| OsHKT1;1-V2 | 67  | LAGNTLFSPLLRL                   | LCVWVLGKVS         | GKAEYAYILQHPGET | GYKHLHVR  | 126 |
| OsHKT1;1-V3 | 209 | -----                           | -----              | -----           | -----     | 209 |
| OsHKT1;1-V4 | 217 | -----                           | -----              | -----           | -----     | 217 |
| OsHKT1;1-V5 | 180 | -----                           | -----              | -----           | -----     | 180 |
| OsHKT1;1-V6 | 156 | -----                           | -----              | -----           | -----     | 156 |
| OsHKT1;1-V7 | 186 | -----                           | -----              | -----           | -----     | 186 |
| OsHKT1;1-V8 | 176 | -----                           | -----              | -----           | -----     | 176 |
| <b>M6</b>   |     |                                 |                    |                 |           |     |
| OsHKT1;1-FL | 361 | LQVMFICSEFNSE                   | SLEGMNWLQKLVGLL    | FQSVNTRQ        | AGESILD   | 420 |
| OsHKT1;1-V1 | 324 | LQVMFICSEFNSE                   | SLEGMNWLQKLVGLL    | FQSVNTRQ        | AGESILD   | 383 |
| OsHKT1;1-V2 | 127 | POVMFICSEFNSE                   | SLEGMNWLQKLVGLL    | FQSVNTRQ        | AGESILD   | 186 |
| OsHKT1;1-V3 | 209 | -----                           | -----              | -----           | -----     | 209 |
| OsHKT1;1-V4 | 217 | -----                           | -----              | -----           | -----     | 217 |
| OsHKT1;1-V5 | 180 | -----                           | -----              | -----           | -----     | 180 |
| OsHKT1;1-V6 | 156 | -----                           | -----              | -----           | -----     | 156 |
| OsHKT1;1-V7 | 186 | -----                           | -----              | -----           | -----     | 186 |
| OsHKT1;1-V8 | 176 | -----                           | -----              | -----           | -----     | 176 |
| <b>M7</b>   |     |                                 |                    |                 |           |     |
| OsHKT1;1-FL | 421 | YLFSDASFILTANADN                | QPLTDKKTNS         | ISRALWRNFT      | VNKL      | 480 |
| OsHKT1;1-V1 | 384 | YLFSDASFILTANADN                | QPLTDKKTNS         | ISRALWRNFT      | VNKL      | 443 |
| OsHKT1;1-V2 | 187 | YLFSDASFILTANADN                | QPLTDKKTNS         | ISRALWRNFT      | VNKL      | 246 |
| OsHKT1;1-V3 | 209 | -----                           | -----              | -----           | -----     | 209 |
| OsHKT1;1-V4 | 217 | -----                           | -----              | -----           | -----     | 217 |
| OsHKT1;1-V5 | 180 | -----                           | -----              | -----           | -----     | 180 |
| OsHKT1;1-V6 | 156 | -----                           | -----              | -----           | -----     | 156 |
| OsHKT1;1-V7 | 186 | -----                           | -----              | -----           | -----     | 186 |
| OsHKT1;1-V8 | 176 | -----                           | -----              | -----           | -----     | 176 |
| <b>M8</b>   |     |                                 |                    |                 |           |     |
| OsHKT1;1-FL | 481 | PLNFN                           | IFSIVFEIISAFGNV    | GYSLGYSC        | QKLLKPDAT | 540 |
| OsHKT1;1-V1 | 444 | PLNFN                           | IFSIVFEIISAFGNV    | GYSLGYSC        | QKLLKPDAT | 503 |
| OsHKT1;1-V2 | 247 | PLNFN                           | IFSIVFEIISAFGNV    | GYSLGYSC        | QKLLKPDAT | 306 |
| OsHKT1;1-V3 | 209 | -----                           | -----              | -----           | -----     | 209 |
| OsHKT1;1-V4 | 217 | -----                           | -----              | -----           | -----     | 217 |
| OsHKT1;1-V5 | 180 | -----                           | -----              | -----           | -----     | 180 |
| OsHKT1;1-V6 | 157 | -----                           | -----              | -----           | -----     | 211 |
| OsHKT1;1-V7 | 186 | -----                           | -----              | -----           | -----     | 186 |
| OsHKT1;1-V8 | 176 | -----                           | -----              | -----           | -----     | 176 |
| <b>M9</b>   |     |                                 |                    |                 |           |     |
| OsHKT1;1-FL | 541 | MFLGRLKEFILK                    | -----              | -----           | -----     | 552 |
| OsHKT1;1-V1 | 504 | MFLGRLKEFILK                    | -----              | -----           | -----     | 515 |
| OsHKT1;1-V2 | 307 | MFLGRLKEFILK                    | -----              | -----           | -----     | 318 |
| OsHKT1;1-V3 | 209 | -----                           | -----              | -----           | -----     | 209 |
| OsHKT1;1-V4 | 217 | -----                           | -----              | -----           | -----     | 217 |
| OsHKT1;1-V5 | 180 | -----                           | -----              | -----           | -----     | 180 |
| OsHKT1;1-V6 | 212 | MFLGRLKEFILK                    | -----              | -----           | -----     | 223 |
| OsHKT1;1-V7 | 186 | -----                           | -----              | -----           | -----     | 186 |
| OsHKT1;1-V8 | 176 | -----                           | -----              | -----           | -----     | 176 |

### Supplementary Figure S4.

Protein sequence alignment of OsHKT1;1-FL and its eight variant using GENETYX ver. 13. Presumed membrane-spanning regions of OsHKT1;1-FL and its eight variants are indicated.



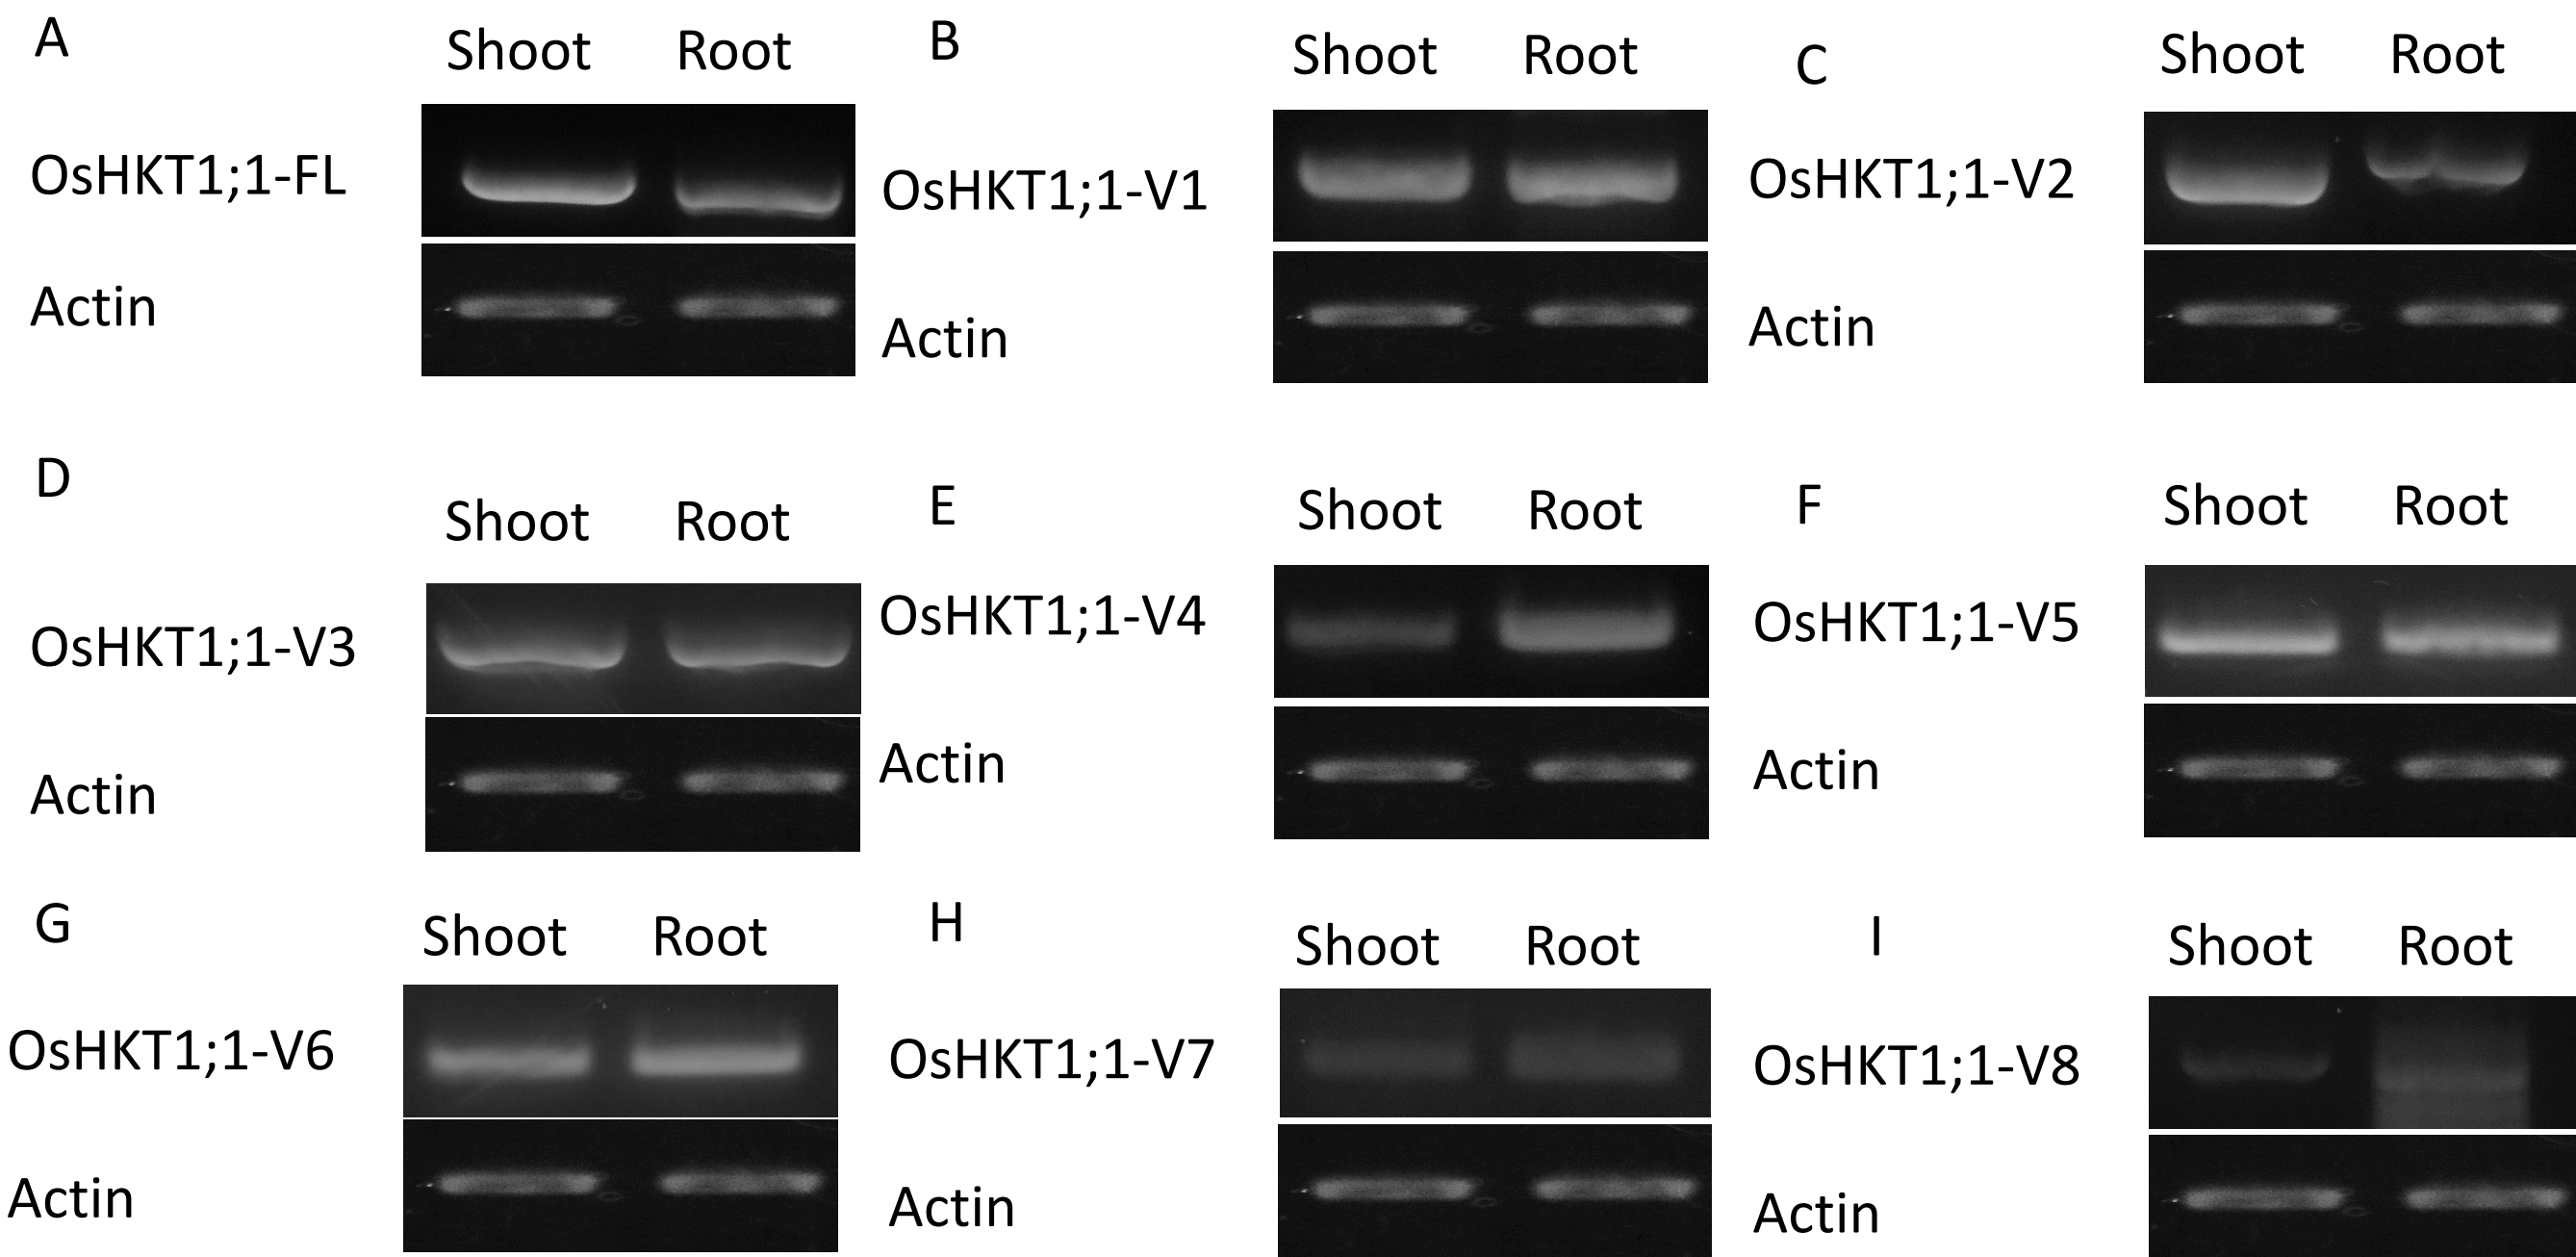

**Supplementary Figure S5.**

Expression analyzed with RT-PCR. OsHKT1;1-FL (A), OsHKT1;1-V1 (B), OsHKT1;1-V2 (C), OsHKT1;1-V3 (D), OsHKT1;1-V4 (E), OsHKT1;1-V5 (F), OsHKT1;1-V6 (G), OsHKT1;1-V7 (H), and OsHKT1;1-V8 (I) in “Pokkali” plants. Actin was used as an internal control.

|                        |     |                                                               |     |
|------------------------|-----|---------------------------------------------------------------|-----|
| OsHKT1;1-FL            | 1   | MHPPSLVLDTLKRIKLYIAMKLLLPNSEVLRRIYWEKAQHLCGFLSMKLISRARCVA     | 60  |
| OsHKT1;1-V1            | 1   | MHPPSLVLDTLKRIKLYIAMKLLLPNSEVLRRIYWEKAQHLCGFLSMKLISRARC       | 55  |
| OsHKT1;1-FL (ΔA56-K92) | 1   | MHPPSLVLDTLKRIKLYIAMKLLLPNSEVLRRIYWEKAQHLCGFLSMKLISRARC       | 55  |
| OsHKT1;1-FL            | 61  | QSYSFLVCKSNPLVVQLVYFVVIISFAGFLALKNLKPQKPGPKDLLLFTSVSTLTVSSM   | 120 |
| OsHKT1;1-V1            | 56  | -----NLKPQKPGPKDLLLFTSVSTLTVSSM                               | 83  |
| OsHKT1;1-FL (ΔA56-K92) | 56  | -----NLKPQKPGPKDLLLFTSVSTLTVSSM                               | 83  |
| OsHKT1;1-FL            | 121 | ATVEMEDLSDRQLWVLIILLMLMGGEVFTSMLGLYFNNANANRNENSQRSLPSISLDIESN | 180 |
| OsHKT1;1-V1            | 84  | ATVEMEDLSDRQLWVLIILLMLMGGEVFTSMLGLYFNNANANRNENSQRSLPSISLDIESN | 143 |
| OsHKT1;1-FL (ΔA56-K92) | 84  | ATVEMEDLSDRQLWVLIILLMLMGGEVFTSMLGLYFNNANANRNENSQRSLPSISLDIESN | 143 |
| OsHKT1;1-FL            | 181 | SPANNGDHKITECGQSEETMSQNQVQQNKSIYINPCAVLVRIVTGYFVATVISSSVIIII  | 240 |
| OsHKT1;1-V1            | 144 | SPANNGDHKITECGQSEETMSQNQVQQNKSIYINPCAAALVRIVTGYFVATVISSSVIIII | 203 |
| OsHKT1;1-FL (ΔA56-K92) | 144 | SPANNGDHKITECGQSEETMSQNQVQQNKSIYINPCAVLVRIVTGYFVATVISSSVIIII  | 203 |
| OsHKT1;1-FL            | 241 | YFWIDSDARNVLKSKEISMYTFCIFTAVSSFANCGFTPLNSNMQPFRKNWVLLLLLVIPQI | 300 |
| OsHKT1;1-V1            | 204 | YFWIDSDARNVLKSKEISMYTFCIFTAVSSFANCGFTPLNSNMQPFRKNWVLLLLLVIPQI | 263 |
| OsHKT1;1-FL (ΔA56-K92) | 204 | YFWIDSDARNVLKSKEISMYTFCIFTAVSSFANCGFTPLNSNMQPFRKNWVLLLLLVIPQI | 263 |
| OsHKT1;1-FL            | 301 | LAGNTLFSPLLRLCVVVLGKVSQKAEYAYILQHPGETGYKHLHVRNRSVYIVLSVTGLIL  | 360 |
| OsHKT1;1-V1            | 264 | LAGNTLFSPLLRLCVVVLGKVSQKAEYAYILQHPGETGYKHLHVRNRSVYIVLSVTGLIL  | 323 |
| OsHKT1;1-FL (ΔA56-K92) | 264 | LAGNTLFSPLLRLCVVVLGKVSQKAEYAYILQHPGETGYKHLHVRNRSVYIVLSVTGLIL  | 323 |
| OsHKT1;1-FL            | 361 | LQVMFICSFEWNSESELEGMNWLQKLVGLLFQSVNTRQAGESILDISTLSPSTLLLFVVM  | 420 |
| OsHKT1;1-V1            | 324 | LQVMFICSFEWNSESELEGMNWLQKLVGLLFQSVNTRQAGESILDISTLSPSTLLLFVVM  | 383 |
| OsHKT1;1-FL (ΔA56-K92) | 324 | LQVMFICSFEWNSESELEGMNWLQKLVGLLFQSVNTRQAGESILDISTLSPSTLLLFVVM  | 383 |
| OsHKT1;1-FL            | 421 | YLPDASFLTANADNQPLTDKKTNSISRALWRNFTVNKLSCLAMFTFLACITERKSISSD   | 480 |
| OsHKT1;1-V1            | 384 | YLPDASFLTANADNQPLTDKKTNSISRALWRNFTVNKPSCLAMFTFLACITERKSISSD   | 443 |
| OsHKT1;1-FL (ΔA56-K92) | 384 | YLPDASFLTANADNQPLTDKKTNSISRALWRNFTVNKLSCLAMFTFLACITERKSISSD   | 443 |
| OsHKT1;1-FL            | 481 | PLNFNIFSIVFEIISAFGNVGYSLGYSCQKLLKPDATCKDASYGFVGRWTEEGKLIVILV  | 540 |
| OsHKT1;1-V1            | 444 | PLNFNIFSIVFEIISAFGNVGYSLGYSCQKLLKPDATCKDASYGSGRWTEEGKLIVILV   | 503 |
| OsHKT1;1-FL (ΔA56-K92) | 444 | PLNFNIFSIVFEIISAFGNVGYSLGYSCQKLLKPDATCKDASYGFVGRWTEEGKLIVILV  | 503 |
| OsHKT1;1-FL            | 541 | MFLGRLKEFILK                                                  | 552 |
| OsHKT1;1-V1            | 504 | MFLGRLKEFILK                                                  | 515 |
| OsHKT1;1-FL (ΔA56-K92) | 504 | MFLGRLKEFILK                                                  | 515 |

### Supplement Figure S6.

Amino acid comparison among OsHKT1;1-FL, native OsHKT1;1-V1 and OsHKT1;1-FL (ΔA56-K92). GENETYX ver. 13 was used for exon-intron analysis.
